# Supplementary material
Source: publisher figshare collection journal article supplement (https://acs.figshare.com/ndownloader/files/26780665)
Supplement: Supplementary file 1 [file 26780665]

## Supporting information

### Decoupling of Mechanical Strength and Ionic Conductivity in Zwitterionic Elastomer Gel Electrolyte towards Safe Batteries

Yan Liu, Lei Hou,\* Yucong Jiao,\* and Peiyi Wu\*

State Key Laboratory for Modification of Chemical Fibers and Polymer Materials, College of Chemistry Chemical Engineering and Biotechnology, Donghua University, Shanghai 201620, China

E-mail: [wupeiyi@dhu.edu.cn](mailto:wupeiyi@dhu.edu.cn); [yucong.jiao@dhu.edu.cn](mailto:yucong.jiao@dhu.edu.cn); [houlei@dhu.edu.cn](mailto:houlel@dhu.edu.cn);

#### This material includes

**Figure S1.** Molecular structures of PVMGE, VIPS, MEA, PEGDA and HHMP

**Figure S2.** Raman spectra characterizing the dissociation effect of PVIPS on LiTFSI

**Figure S3.** (a) Images of PV<sub>4</sub>M<sub>3</sub>GE before and after the compression; (b) exhibition of the brittleness of PVIPS gel electrolyte

**Figure S4.** Frequency dependencies of the storage (G') and loss (G'') moduli of PV<sub>1</sub>M<sub>1</sub>GE

**Figure S5.** Tensile test of the PV<sub>1</sub>M<sub>1</sub>GE

**Figure S6.** Ionic conductivity of the PVMGEs with different VIPS/MEA weight ratios

**Figure S7.** Temperature dependence of ionic conductivity of PV<sub>1</sub>M<sub>1</sub>GE

**Figure S8.** Li plating/stripping voltage profiles of lithium symmetric cells with liquid electrolyte at a current density of 1 mA cm<sup>-2</sup>

**Figure S9.** Cycling stability of lithium symmetric cell with liquid electrolyte at a current density of 3 mA cm<sup>-2</sup>

**Figure S10.** Cycling stability of PMEA electrolyte for lithium symmetrical battery at current density of  $1 \text{ mA cm}^{-2}$

**Figure S11.** SEM image of lithium anode of lithium symmetric battery with liquid electrolyte after cycling for 200 h at current density  $1 \text{ mA cm}^{-2}$

**Figure S12.** SEM images of lithium anode of lithium symmetric cell with PMEA after cycling for 200 h at current density  $1 \text{ mA cm}^{-2}$

**Figure S13.** (a) LSV curve of lithium symmetric cell with liquid electrolyte at a scan rate of  $10 \text{ mV s}^{-1}$ . (b) CV profiles of  $\text{LiFePO}_4/\text{PV}_1\text{M}_1\text{GE}/\text{Li}$  at a scan rate of  $0.1 \text{ mV s}^{-1}$  in a potential window from 2 to 4V. (c) rate performances of  $\text{LiFePO}_4/\text{Li}$  with liquid electrolyte at 0.5, 1, 2, 3, 5 C; (d) cycling performances of liquid electrolyte at 5 C

**Figure S14.** Cycle stability of  $\text{LiFePO}_4/\text{Li}$  cell with PMEA at 5 C

**Table S1.** Comparison of electrochemical performance for  $\text{PV}_1\text{M}_1\text{GE}$  with other electrolytes

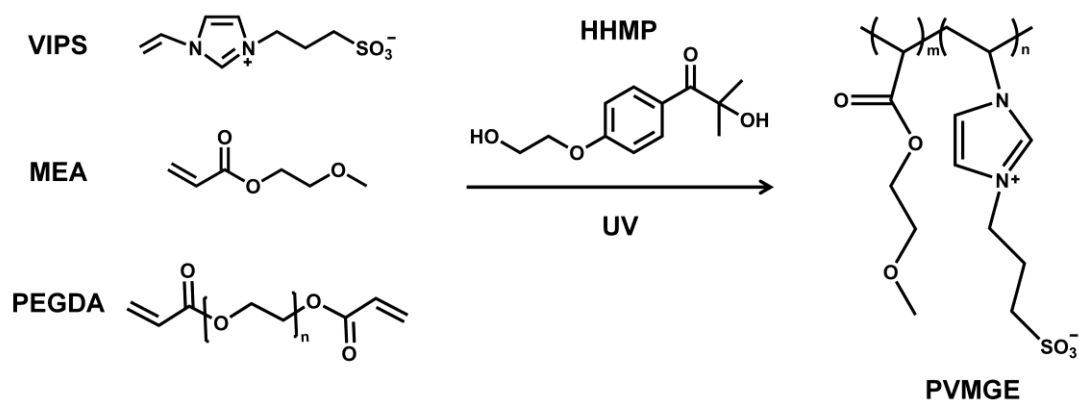

**Figure S1.** Molecular structures of PVMGE, VIPS, MEA, PEGDA and HHMP.

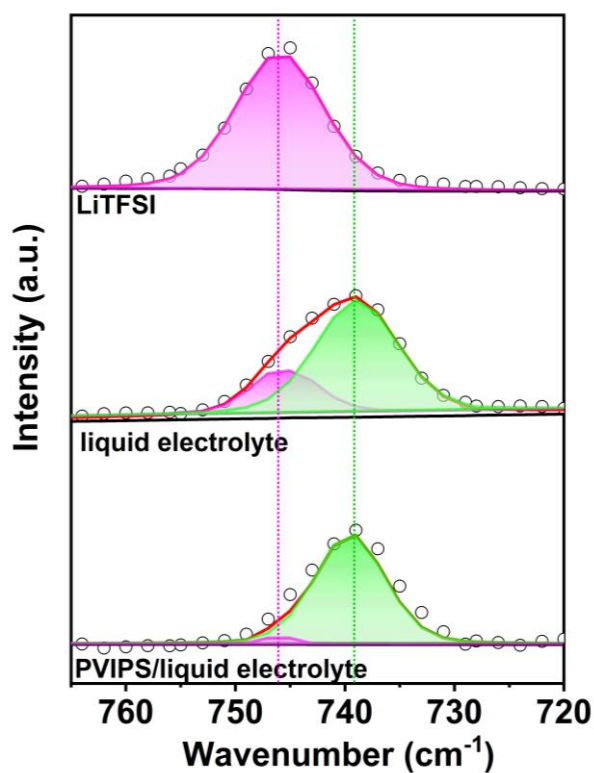

**Figure S2.** Raman spectra characterizing the dissociation effect of PVIPS on LiTFSI. The band at 739 cm<sup>-1</sup> is related to uncoordinated TFSI<sup>-</sup> while the band at 746 cm<sup>-1</sup> is related to bonded ion pairs. The ratio of uncoordinated TFSI<sup>-</sup> anions and bonded ion pairs is 0.76 in liquid electrolyte and 0.93 in PVIPS/liquid electrolyte, respectively.

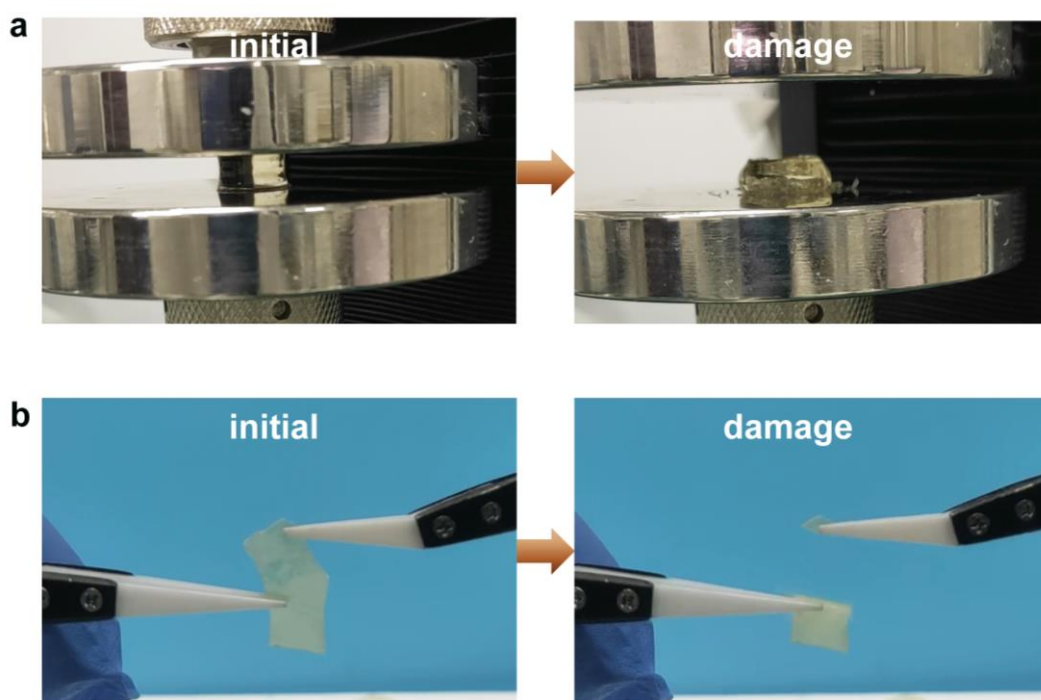

**Figure S3.** (a) Images of  $PV_4M_3GE$  before and after the compression; (b) exhibition of the brittleness of PVIPS gel electrolyte.

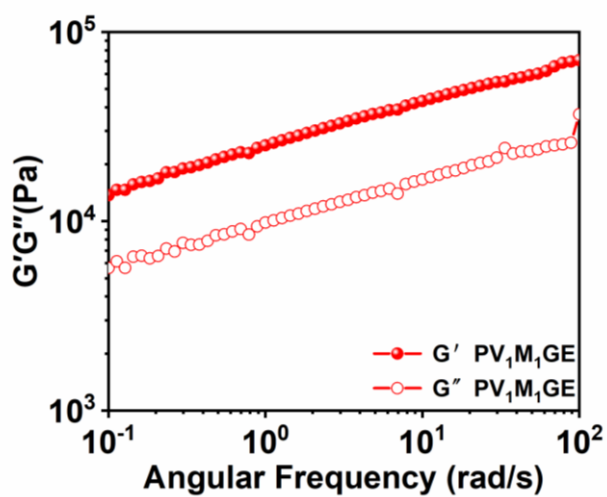

**Figure S4.** Frequency dependencies of the storage ( $G'$ ) and loss ( $G''$ ) moduli of  $PV_1M_1GE$ .

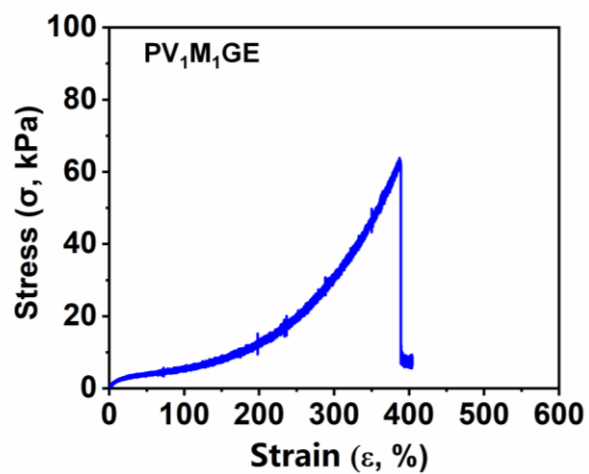

**Figure S5.** Tensile test of the PV<sub>1</sub>M<sub>1</sub>GE.

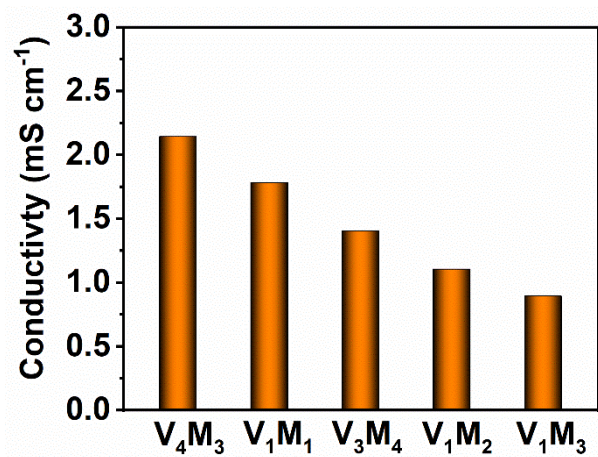

**Figure S6.** Ionic conductivity of the PVMGEs with different VIPS/MEA weight ratios.

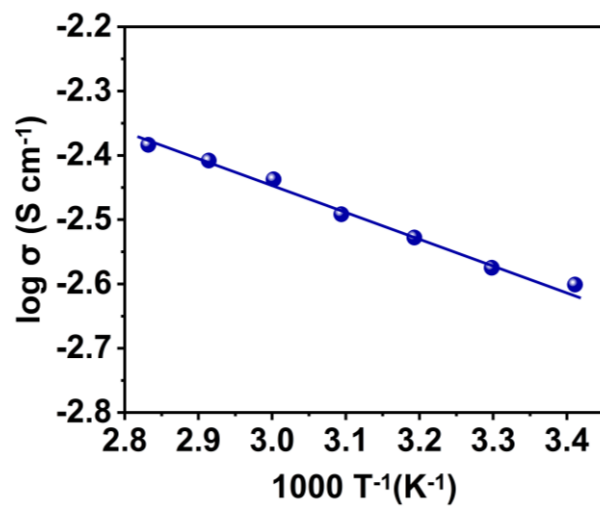

**Figure S7.** Temperature dependence of ionic conductivity of PV<sub>1</sub>M<sub>1</sub>GE.

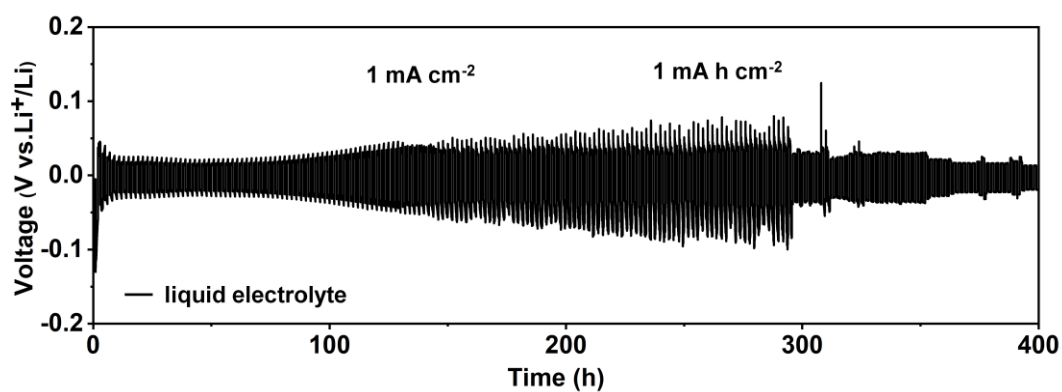

**Figure S8.** Li plating/stripping voltage profiles of lithium symmetric cells with liquid electrolyte at a current density of 1 mA cm<sup>-2</sup>.

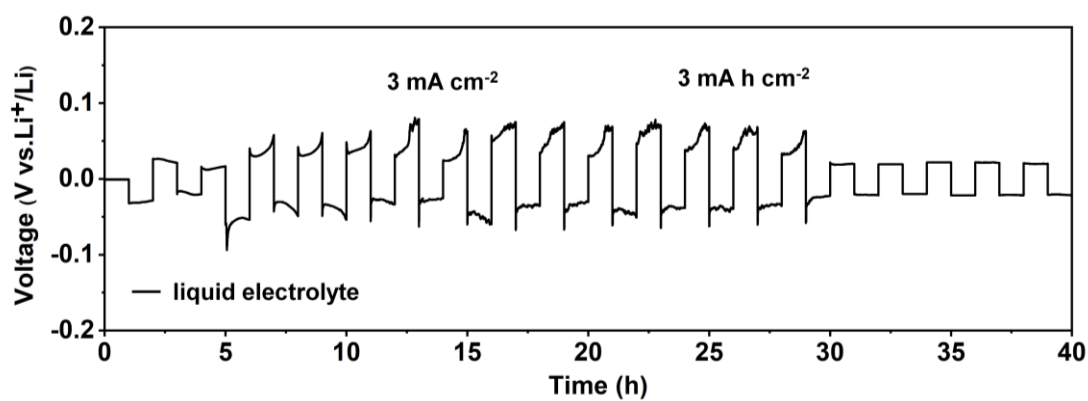

**Figure S9.** Cycling stability of lithium symmetric cell with liquid electrolyte at a current density of  $3 \text{ mA cm}^{-2}$ .

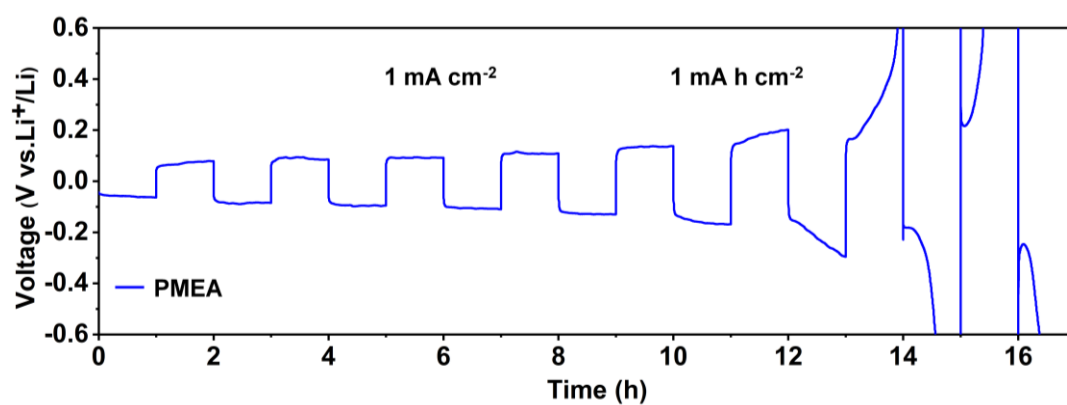

**Figure S10.** Cycling stability of PMEA electrolyte for lithium symmetrical battery at current density of  $1 \text{ mA cm}^{-2}$ .

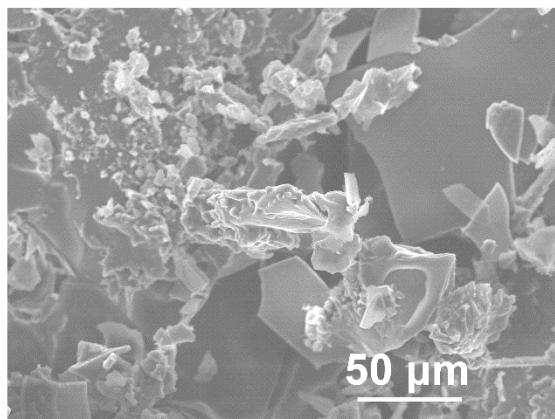

**Figure S11.** SEM image of lithium anode of lithium symmetric battery with liquid electrolyte after cycling for 200 h at current density  $1 \text{ mA cm}^{-2}$ .

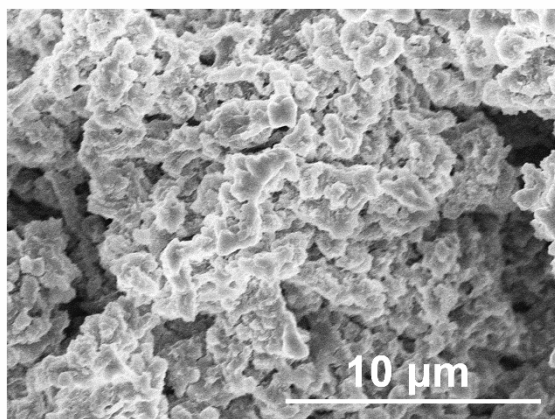

**Figure S12.** SEM images of lithium anode of Li/PMEA/Li cell after cycling for 200 h at current density  $1 \text{ mA cm}^{-2}$ .



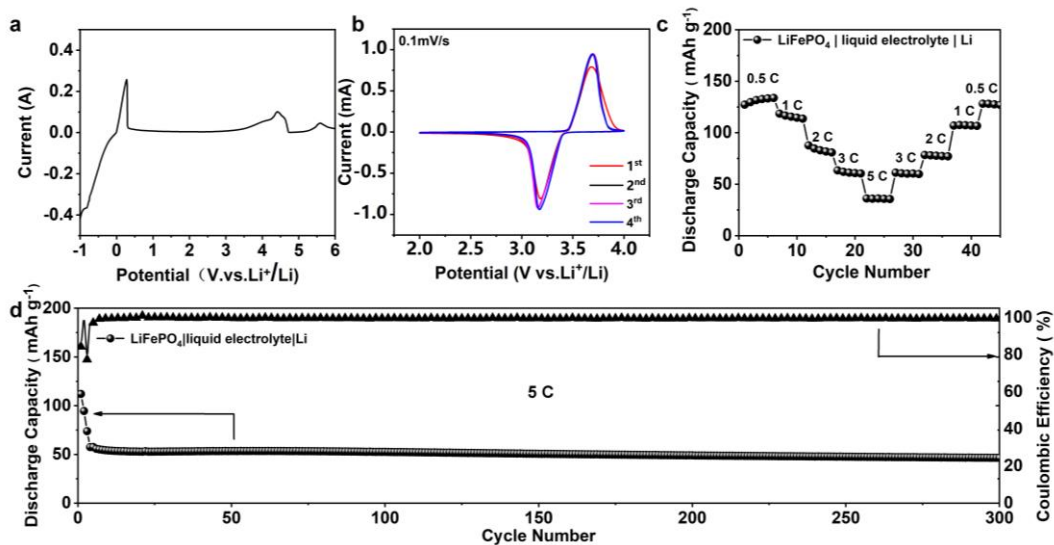

**Figure S13.** (a) LSV curve of lithium symmetric cell with liquid electrolyte at a scan rate of  $10 \text{ mV s}^{-1}$ . (b) CV profiles of  $\text{LiFePO}_4/\text{PV}_1\text{M}_1\text{GE}/\text{Li}$  at a scan rate of  $0.1 \text{ mV s}^{-1}$  in a potential window from 2 to 4V. (c) rate performances of  $\text{LiFePO}_4/\text{Li}$  with liquid electrolyte at 0.5, 1, 2, 3, 5 C; (d) cycling performances of liquid electrolyte at 5 C.

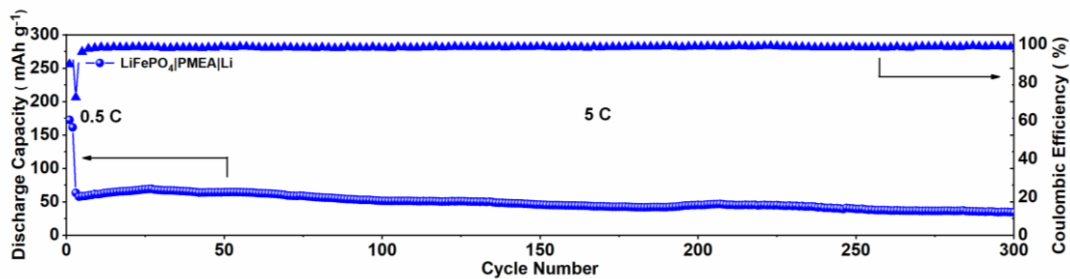

**Figure S14.** Cycling performance of  $\text{LiFePO}_4/\text{Li}$  cell with PMEAE electrolyte at 5 C.

**Table S1.** Comparison of electrochemical performance for PV<sub>1</sub>M<sub>1</sub>GE with other electrolytes.

| GPE                                   | Li/Li                                     |                        | LiFePO <sub>4</sub> /Li                          |                                                  | Ref.     |
|---------------------------------------|-------------------------------------------|------------------------|--------------------------------------------------|--------------------------------------------------|----------|
|                                       | Current density<br>(mA cm <sup>-2</sup> ) | Cycle Lifespans<br>(h) | Current density<br>(1 C=170 mA g <sup>-1</sup> ) | Discharge<br>capacity<br>(mA h g <sup>-1</sup> ) |          |
| PV <sub>1</sub> M <sub>1</sub> GE     | 1                                         | 700                    | 5 C                                              | 70                                               | Our work |
| PVDF- HFP                             | 1                                         | 250                    | 2 C                                              | 57                                               | 1        |
| SiO <sub>2</sub> -GPE                 | 1                                         | 400                    | 0.1 C                                            | 125                                              | 2        |
| glass fiber- poly<br>(butyl acrylate) | 0.5                                       | ~250                   | 0.5 C                                            | 84                                               | 3        |
| PAN-PEO                               | -                                         | -                      | 0.1 C                                            | 149                                              | 4        |
| cellulose aerogel<br>membranes        | -                                         | -                      | 0.5 C                                            | 134                                              | 5        |
| double polymer<br>network-GPE         | 0.5                                       | <400                   | 0.5                                              | 124                                              | 6        |

## References

- (1) Li, L.; Wang, M.; Wang, J.; Ye, F.; Wang, S.; Xu, Y.; Liu, J.; Xu, G.; Zhang, Y.; Zhang, Y.; Yan, C.; Medhekar, N. V.; Liu, M.; Zhang, Y. Asymmetric Gel Polymer Electrolyte with High Lithium Ion Conductivity for Dendrite-Free Lithium Metal Batteries. *J. Mater. Chem. A* **2020**, *8*, 8033-8040.
- (2) Yang, P.; Gao, X.; Tian, X.; Shu, C.; Yi, Y.; Liu, P.; Wang, T.; Qu, L.; Tian, B.; Li, M.; Tang, W.; Yang, B.; Goodenough, J. B. Upgrading Traditional Organic Electrolytes toward Future Lithium Metal Batteries: A Hierarchical Nano-SiO<sub>2</sub>-Supported Gel Polymer Electrolyte. *ACS Energy Lett.* **2020**, *5*,

1681-1688.

(3) Wu, S.; Zheng, H.; Tian, R.; Hei, Z.; Liu, H.; Duan, H. In-Situ Preparation of Gel Polymer Electrolyte with Glass Fiber Membrane for Lithium Batteries. *J. Power Sources* **2020**, *472*, 228627.

(4) Kuo, P. L.; Wu, C. A.; Lu, C. Y.; Tsao, C. H.; Hsu, C. H.; Hou, S. S. High Performance of Transferring Lithium Ion for Polyacrylonitrile-Interpenetrating Crosslinked Polyoxyethylene Network as Gel polymer Electrolyte. *ACS Appl. Mater. Interfaces* **2014**, *6*, 3156-3162.

(5) Wan, J.; Zhang, J.; Yu, J.; Zhang, J. Cellulose Aerogel Membranes with a Tunable Nanoporous Network as a Matrix of Gel Polymer Electrolytes for Safer Lithium-Ion Batteries. *ACS Appl. Mater. Interfaces* **2017**, *9*, 24591-24599.

(6) Zuo, T. T.; Shi, Y.; Wu, X. W.; Wang, P. F.; Wang, S. H.; Yin, Y. X.; Wang, W. P.; Ma, Q.; Zeng, X. X.; Ye, H.; Wen, R.; Guo, Y. G. Constructing a Stable Lithium Metal-Gel Electrolyte Interface for Quasi-Solid-State Lithium Batteries. *ACS Appl. Mater. Interfaces* **2018**, *10*, 30065-30070.
